1 **Switching the left and the right hearts: A novel bi-ventricle mechanical**  
2 **support strategy with spared native single-ventricle**

3  
4 Emrah Şişli<sup>1\*</sup>, Canberk Yıldırım<sup>2</sup>, İbrahim Başar Aka<sup>3</sup>, Osman Nuri Tuncer<sup>4</sup>, Yüksel  
5 Atay<sup>4</sup>, Mustafa Özbaran<sup>5</sup>, Kerem Pekkan<sup>6\*</sup>

6  
7 <sup>1</sup>Section of Paediatric Cardiovascular Surgery, Department of Cardiovascular Surgery,  
8 Osmangazi University Faculty of Medicine, Eskişehir, Turkey

9 <sup>2</sup>Department of Biomedical Sciences and Engineering, Koç University, Istanbul, Turkey

10 <sup>3</sup>Department of Mechatronics Engineering, İstanbul Bilgi University, Istanbul, Turkey

11 <sup>4</sup>Section of Paediatric Cardiovascular Surgery, Department of Cardiovascular Surgery, Ege  
12 University Faculty of Medicine, İzmir, Turkey

13 <sup>5</sup>Section of Heart Transplantation, Department of Cardiovascular Surgery, Ege University  
14 Faculty of Medicine, İzmir, Turkey

15 <sup>6</sup>Department of Mechanical Engineering, Koç University, Istanbul, Turkey

16

17 \* *This study is conducted through joint corresponding authors.*

18

19 **Address for Correspondence**

20

21 Emrah Şişli MD

22 Associate Professor

23 Section of Paediatric Cardiovascular Surgery, Department of Cardiovascular Surgery,  
24 Osmangazi University Faculty of Medicine. Büyükdere district, Campus of Meşelik, 26480,  
25 Tepebaşı, Eskişehir, Turkey. Phone: +90-222-2393750 – 3400, Cell phone: +90-505-5985233,  
26 Fax: +90-222-2292527, E-mail: [emrah.sisli@ogu.edu.tr](mailto:emrah.sisli@ogu.edu.tr)

27

28 Kerem Pekkan, PhD

29 Professor

30 Mechanical Engineering Department Koç University

31 Rumeli Feneri Campus, Sarıyer, Istanbul, Turkey, Phone: +90 (533) 356 3595, Fax: +90  
32 (212) 338 1548, E-mail: [kpekk@ku.edu.tr](mailto:kpekk@ku.edu.tr)

33

## 34 **Abstract**

35 Mechanical circulatory support (MCS) is used as a bridge-to-heart transplantation for  
36 end-stage failing Fontan patients with single-ventricle (SV) circulation. Donor  
37 shortage and complexity of the single-ventricle circulation physiology demands novel  
38 circulatory support systems and alternative solutions. An out-of-the-box circulation  
39 concept in which the left and right ventricles are switched with each other inspired a  
40 novel bi-ventricle MCS configuration for the “failing” Fontan patients. In the proposed  
41 configuration, the systemic circulation is maintained by a conventional mechanical  
42 ventricle assist device while the venous circulation is delegated to the native SV. This  
43 approach spares the SV and puts it to a new use at the right-side providing the most  
44 needed venous flow pulsatility. To analyze its feasibility and performance, 8 realistic  
45 Fontan circulation scenarios have been studied via a multi-compartmental lumped  
46 parameter cardiovascular model (LPM). Model is developed specifically for simulating  
47 the SV circulation and validated against pulsatile mock-up flow loop measurements  
48 for the ideal (*Fontan*), failed (*VD*) and assisted Fontan (*PVR-cmcs*) scenarios. The  
49 proposed surgical configuration maintained the cardiac index (3-3.5 l/min/m<sup>2</sup>)  
50 providing a normal mean systemic arterial pressure. For a failed SV with low ejection  
51 fraction (EF=26%), representing a typical systemic failure, proposed configuration  
52 introduced a venous/pulmonary pulsatility of ~28 mmHg and a drop of 2 mmHg in  
53 central venous pressure (CVP) with acceptable pulmonary artery pressures (17.5  
54 mmHg). In the pulmonary vascular resistance (PVR) failure model, it provided  
55 approximately 5 mmHg drop in CVP with venous/pulmonary pulsatility reaching ~22  
56 mmHg. For high PVR failure case with a healthy SV (EF = 44%) pulmonary  
57 hypertension is likely to occur, indicating a need for precise functional assessment of  
58 the failed-ventricle before it is considered for the proposed arrangement.  
59 Comprehensive *in vitro* and *in silico* results encourage this concept as an economical  
60 alternative to the conventional bi-ventricle MCS pending animal experiments.

61

62 **Key words:** Single-ventricle physiology, Fontan circulation, Hemodynamics,  
63 Ventricle assist devices, Mechanical circulatory support, Mock-up flow loops, Lumped  
64 parameter modelling, Congenital heart surgery, Cardiovascular circulation theory

65

## 66 **1. Introduction**

67 Each year, about 8 in a thousand babies are born with a clinically significant  
68 congenital heart defect<sup>1,2</sup>. Single-ventricle (SV) heart defects are among the most  
69 serious congenital complications requiring a series of very complex palliative surgical  
70 reconstructions with the aim to achieve an optimally working single-ventricle  
71 circulation to compensate the missing right-heart. The third surgical stage of this  
72 series is the Fontan procedure<sup>3</sup> first performed in 1971. Following this pioneering  
73 surgical procedure, advances in pediatric cardiac surgery have resulted in reduced  
74 morbidity and mortality in this vulnerable patient group<sup>4-8</sup>. Unfortunately, the current  
75 surgical therapy is palliative; as the child grows, due to vascular remodeling and  
76 hemodynamic adaptations, this complex and surgically reconstructed physiology  
77 gradually fails, finally leading to severe heart failure at late adulthood. Over the years  
78 the number of adult Fontan survivors waiting for heart transplantation have increased  
79 dramatically, with severe complications related to the gastrointestinal system,  
80 including feeding disorders, liver dysfunction, protein losing enteropathy and plastic  
81 bronchitis<sup>9</sup>.

82 Steadily increasing number of “adult Fontan survivors” with poor quality of life  
83 is a major health problem<sup>10,11</sup>, as almost all patients eventually require either heart  
84 transplantation or mechanical circulatory support (MCS), during late adulthood<sup>12</sup>.  
85 Shortage of donor organ supply has made MCS an inevitable surgical tool for bridge-  
86 to-transplantation to improve a patient’s transplant candidacy<sup>13,14</sup>. While a variety of  
87 surgical concepts using pulsatile- or continuous flow MCS devices are being  
88 proposed<sup>15-19</sup>, novel approaches and breakthrough devices are still desired to  
89 address the physiology-related limitations of the single-ventricle circulation. For  
90 example, our group recently proposed an implantable Fontan ventricle assist device

91 without external power and without inlet/outlet tubing<sup>20</sup>. For the right-heart MCS,  
92 compared to the left side, the low pulmonary vascular resistance (PVR) requires a  
93 high-volume/low pressure pump<sup>21</sup>. This requirement is not necessarily compatible  
94 with the existing conventional MCS devices that can supply higher afterloads<sup>22</sup>. Most  
95 importantly, the clinically available MCS systems could not achieve physiological  
96 pulsatility levels at the right side, which is essential to preserve the venous,  
97 pulmonary, and lymphatic function of Fontan patients<sup>11</sup>. Therefore, in this study, we  
98 introduce a novel Fontan-MCS modification that can provide the desired physiological  
99 “native right ventricle-like” pulsatile flow to support and gradually heal the Fontan  
100 failure. Hemodynamic characteristics of this concept was analyzed focusing primarily  
101 on the patients with their early stage of failed Fontan circulation that display systemic  
102 heart failure (New York Class II and III), in whom a left ventricular mechanical assist  
103 device is normally considered as a bridge-to-heart transplantation (Figure 1a). The  
104 concept was also tested for the high-PVR Fontan failure model. We hypothesize that  
105 in combination with the conventional left ventricle assist device therapy, rather than  
106 discarding the native SV, sparing it for the right heart support would result the desired  
107 venous hemodynamics (Figure 1b). Furthermore, in some patients, where a bi-  
108 ventricle MCS support is essential, this approach will provide significant cost savings  
109 that is much significant for resource-limited settings and third-world countries with  
110 limited access to MCS devices.

111

112

113

114

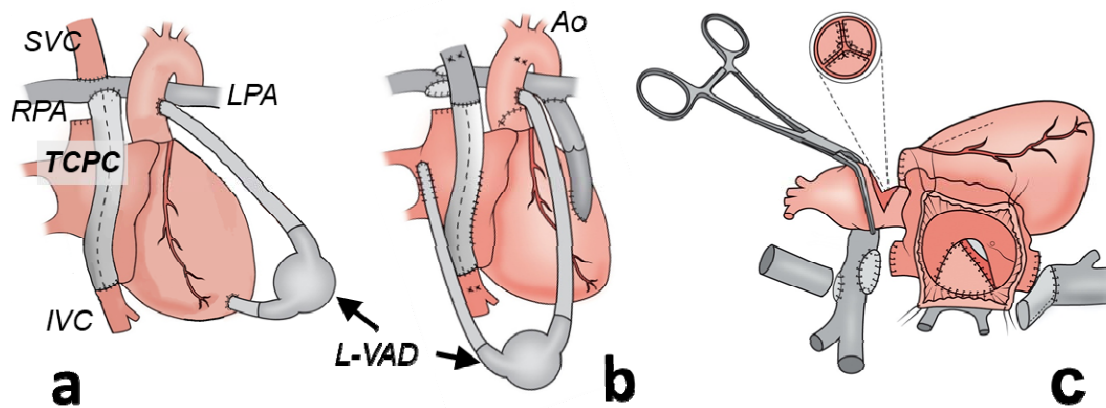

115 **Figure 1. (a)** Traditional left ventricle assist device (L-VAD) implantation  
116 configuration for systemic single-ventricle (SV) failure of the total cavopulmonary  
117 (TCPC) circulation. **(b)** Proposed configuration where the native SV is utilized as a  
118 pulsatile right heart. To achieve this Fontan (TCPC) tube graft is anastomosed to the  
119 right atrium, systemic circulation is maintained by L-VAD from pulmonary venous  
120 chamber to aorta (Ao), and pulmonary circulation is delegated to the SV via a conduit  
121 interposed between the SV and pulmonary artery bifurcation. **(c)** A sketch displaying  
122 the surgeons view is provided during the take-down of TCPC anastomoses, patch  
123 plasty of the pulmonary artery, creation of a posteriorly placed pulmonary venous  
124 chamber, and aortic valve closure through aortotomy. (LPA: Left pulmonary artery.  
125 RPA: Right pulmonary artery. IVC: Inferior vena cava, SVC: Superior vena cava)

126

127 To the best of our knowledge, there is no available technique in failing Fontan  
128 patients in whom the systemic circulation is maintained by a standard MCS, and the  
129 cavopulmonary circulation is delegated to the native SV as illustrated in Figure 1b. In  
130 this manuscript, analyses were performed for an optimal Fontan circulation, high PVR  
131 and ventricular dysfunction Fontan failures. These failure models were also examined  
132 under the conventional support and the proposed modification, using a clinical  
133 commercial HeartWare HVAD (Medtronic) device, *in vitro* and *in silico*. An  
134 established Fontan mock-up flow loop and a computational lumped parameter

135 cardiovascular model (LPM) originally developed for Fontan circulation research were  
136 used to investigate a variety of clinically significant states.

137

## 138 **2. Fontan Circulation States**

139 **2.1 Ideal Fontan Circulation (Fontan):** The ideal Fontan circulation state was  
140 modelled based on the Egbe et. al<sup>23</sup> and our previous Fontan study<sup>20</sup>. SV was  
141 determined to have an ejection fraction (EF) of 44% and a stroke volume of 62 ml.  
142 Table 1 provides the characteristic clinical and anthropometric data based on the  
143 literature for the average age of an individual experiences Fontan failure. Cardiac  
144 parameters, systemic and pulmonary vascular resistances (SVR and PVR,  
145 respectively) were determined based on these typical representative patient  
146 characteristics.

147

148

149

150

151

152

153

154

155

156 **Table 1.** Cardiovascular anthropometric data of an idealized Fontan patient.

157 Compiled from literature and clinical experience<sup>13,14</sup>.

| Variable                             | Data |
|--------------------------------------|------|
| Age, years                           | 15   |
| Height, cm                           | 150  |
| Body weight, kg                      | 50   |
| Body surface area, m <sup>2</sup>    | 1.44 |
| Heart rate, bpm                      | 70   |
| Cardiac index, l/min/m <sup>2</sup>  | 3    |
| Common atrial volume, ml             | 70   |
| Systemic venous chamber volume, ml*  | 45   |
| Pulmonary venous chamber volume, ml* | 25   |

158 \* indicates venous chamber volumes after partitioning of the common atrium (CA) employed in cases  
159 VD-switch, PVR-switch, bPVRtc-switch and bPVRtc-Pswitch.

160

161 For this baseline case, the cardiac index (CI) was set to 3.0 l/min/m<sup>2</sup>, and the  
162 systolic, diastolic, and mean aortic pressures were set to 100 mmHg, 67 mmHg, and  
163 82 mmHg, respectively. Figure 2a and Figure 3a represent the LPM framework and  
164 *in vitro* Mock-up loop developed for this ideal (baseline) Fontan circulation,  
165 respectively.

166 **2.2 Fontan Failure, Ventricular Dysfunction (VD):** This case was generated based  
167 on moderate/severe ventricular dysfunction classification introduced by the New York  
168 Heart Association. Case VD was analyzed as two VD-Ac and VD-Cr cases  
169 considering the acute and chronic effects of the ventricular failure, respectively.

170 In *VD-Ac*, stroke volume in *Fontan* was reduced from 62 ml to 38 ml, that  
171 leads to an EF of 26%. Therefore, sudden (acute) effect of the ventricular failure was  
172 simulated. In *VD-Cr*, physiologic response of cardiovascular system to the acute  
173 decrease in aortic pressure and CI was investigated. Such drop was compensated by  
174 increasing SVR index from 22.8 WU.m<sup>-2</sup> to 27.6 WU.m<sup>-2</sup>.

175 **2.3 Fontan Failure, Increased Pulmonary Vascular Resistance (PVR):** In *PVR*  
176 case, another common mode of Fontan failure was established through high PVR  
177 index based on Egbe et. al<sup>23</sup>. It was analyzed through cases *PVR-Ac* and *PVR-Cr*  
178 considering the acute and chronic effects of the high PVR index, respectively.

179 In *PVR-Ac*, PVR was increased from 1.65 WU.m<sup>-2</sup> to 3.3 WU.m<sup>-2</sup> to simulate  
180 the acute (sudden) effect of the PVR related Fontan failure. Altering the heart  
181 function or circulation parameters is not focused in this study in order to clearly  
182 isolate the sole effect of the proposed modification. Still an exercise case is provided  
183 to test off-design operation. Therefore, in *PVR-Cr*, as observed in Fontan patients,  
184 SVR index and systemic venous compliance were both increased by approximately  
185 10% to replicate the physiological cardiovascular system response for preserving the  
186 cardiac output and systemic arterial pressure.

187

188



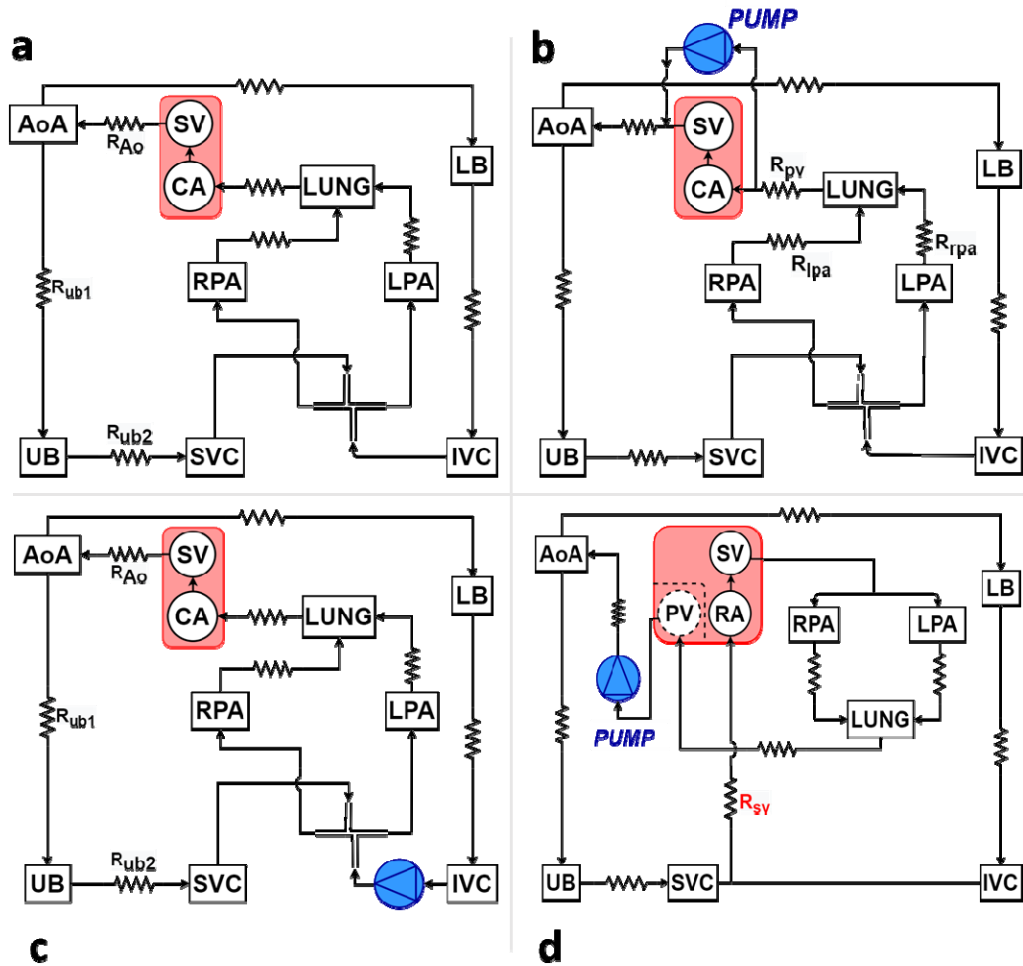

189

190 **Figure 2.** Electrical analog circulation networks analyzed in this study. (a) Healthy  
 191 and failed Fontan circulations (Cases: *Fontan*, *VD* and *PVR*), (b) Conventional  
 192 mechanical circulatory support (MCS) of ventricular dysfunction Fontan failure, Case:  
 193 *VD-cmcs*. (c) Conventional MCS of increased PVR Fontan failure, Case: *PVR-cmcs*  
 194 and (d) the proposed MCS modification cases *VD-switch* and *PVR-switch*. SV: single  
 195 ventricle, CA: common atrium, AoA: aortic arch, LB (UB): lower (upper) body, IVC  
 196 (SVC): inferior (superior) vena cava, RPA (LPA): right (left) pulmonary artery, LUNG:  
 197 lungs, PV: posterior pulmonary venous (surgically separated from the CA with the  
 198 dashed lines), RA: right atrium,  $R_{Ao}$ : aorta resistance,  $R_{lb}$  ( $R_{ub}$ ): lower (upper) body  
 199 resistances,  $R_{TCPC}$ : TCPC resistance,  $R_{rpa}$  ( $R_{lpa}$ ): right (left) pulmonary artery  
 200 resistance,  $R_{sv}$ : systemic venous resistance,  $R_{pv}$ : pulmonary venous resistance.

201

202

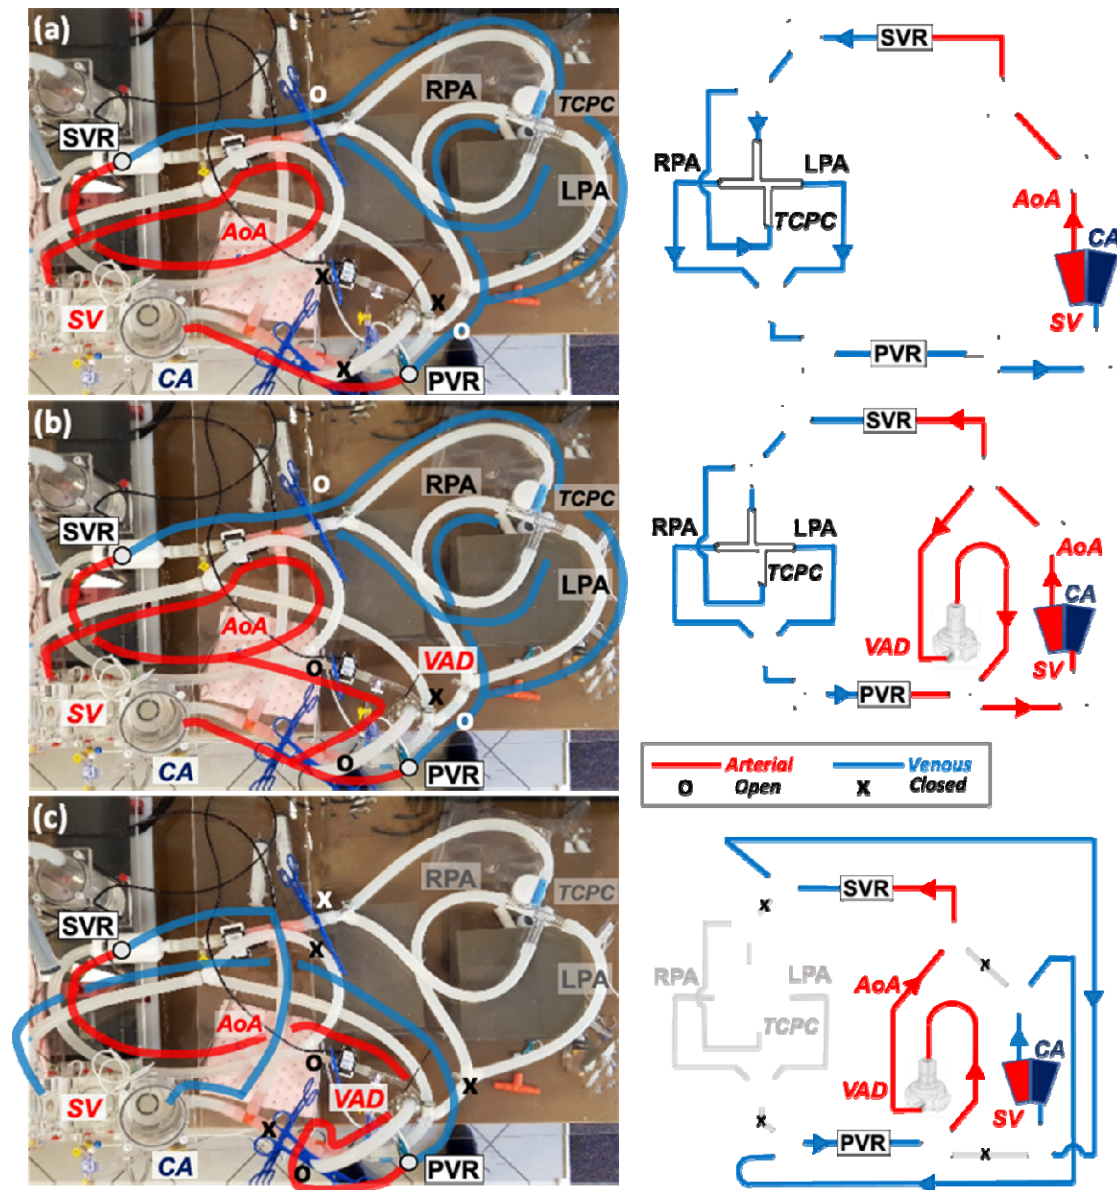

203

204 **Figure 3.** Fontan circulation cases replicated experimentally in our mock-up flow loop  
 205 for *in-vitro* validation experiments. In a typical experimental run, cases are simulated  
 206 in-sequence to allow direct comparison of measurements with each other. Starting  
 207 with the (a) ideal, baseline *Fontan* circulation followed by the ventricular dysfunction  
 208 failure case: *VD*, (b) MCS of ventricular dysfunction failure (*VD-cmcs*) and (c) the  
 209 current modification where the MCS device operates as the left ventricle and the  
 210 single-ventricle (SV) operates as the right ventricle (Case: *VD-switch*). Red and blue  
 211 lines indicate the systemic and pulmonary circulations, respectively. Gray colored  
 212 lines for the baseline Fontan network were removed in *VD-switch* configuration. SVR:

213 Systemic vascular resistance, PVR: Pulmonary vascular resistance, RPA: Right  
214 pulmonary artery, LPA: Left pulmonary artery, Ao: Aorta, TCPC: Total cavopulmonary  
215 connection, CA: Common atrium, VAD: Ventricle assist device (HeartWare HVAD  
216 from Medtronic).

217

218 **2.4 Conventional Mechanical Circulatory Support of the Ventricular**  
219 **Dysfunction Fontan Failure (VD-cmcs):** Case *VD-cmcs* corresponds to the  
220 conventional MCS (cmcs) of the Fontan failure state introduced in *VD-Cr*. In this  
221 configuration, MCS device supports the systemic circulation by working in parallel to  
222 the failing SV (EF=26%), as shown in Figure 2b and Figure 3b. The device was  
223 operated at 2560 rpm, which provided a flow rate of 2.82 l/min to support the  
224 ventricular dysfunction in terms of pressure and flow rate needs.

225 **2.5 Conventional Mechanical Circulatory Support of the Fontan Failure with**  
226 **Increased Pulmonary Vascular Resistance (PVR-cmcs):** The conventional MCS  
227 support strategy intended for the high PVR Fontan failure model as introduced in  
228 *PVR-Cr* (Section 2.3) is simulated. Using our earlier cavopulmonary Fontan support  
229 framework<sup>24</sup>, MCS device was integrated between the systemic venous and  
230 pulmonary artery (PA), as shown in Figure 2c.

231 In *PVR-cmcs*, both continuous and pulsatile flow MCS device operation was  
232 investigated. For continuous flow support, MCS device was operated at a constant  
233 rotational speed of 2205 rpm. To impose the pulsatile operation condition, the  
234 rotational speed of MCS device was modulated sinusoidally ( $\pm 400$  rpm) during the  
235 operation. MCS device provided a flow rate of 3.0 l/min to decrease the central  
236 venous pressure (CVP) and support the cavopulmonary circulation in both operation  
237 conditions.

238 **2.6 Proposed Modification, Tested for Ventricular Dysfunction Failure (VD-**  
239 **switch):** Case *VD-switch* represents the application of proposed modification to the  
240 Fontan failure mode introduced above as *VD-Cr* (Section 2.2).

241 Here, a 25 ml volume was isolated surgically from the total common atrium  
242 (CA) volume (70 ml) to form a neo-pulmonary venous return chamber. The remaining  
243 portion of CA serves as a right atrium. Systemic venous return was redirected to the  
244 new right atrium, after detaching it from the conventional total cavopulmonary  
245 connection (TCPC). Thus, systemic and pulmonary circulations become parallel  
246 similar to a normal biventricular circulation. SV was connected to PA to maintain the  
247 pulmonary circulation. Systemic circulation was governed by the MCS device having  
248 an inlet draining from the neo-pulmonary venous chamber, yet its outlet was placed  
249 to the aorta, functioning like a native left ventricle. MCS device was set to work at  
250 3300 rpm, which provided a total cardiac output of 4.95 l/min to the systemic  
251 circulation. In Figure 1b, a cartoon representation of the proposed modification is  
252 provided together with surgical details in Figure 1c. The corresponding circuit  
253 analogue is provided in Figure 2d as used in LPM computations.

254 Performance of the modification in case *VD-switch* was also investigated  
255 during the metabolic activity. To perform a simple leg activity (walking function), the  
256 exercise protocol introduced by Kung et. al.<sup>25</sup> for Fontan patients was used. Based  
257 on this protocol, from rest (MET=0.65) to mild lower body exercise (MET=5), all  
258 parameters were remained constant except that the HR was increased from 66 bpm  
259 to 130 bpm and SVR was decreased by 15%.

260 **2.7 Proposed Modification, Tested for the Increased Pulmonary Vascular**  
261 **Resistance (PVR-switch):** Here the proposed modification was applied to the high  
262 PVRI failure Fontan model introduced in *PVR-Cr* (Section 2.3). MCS device

263 governing the systemic circulation was operated at 3175 rpm corresponding to the  
264 flow rate of 4.32 l/min.

265 *PVR-switch* was also investigated for the activated compensatory mechanisms  
266 through *bPVRtc-switch*. In this case, heart rate was increased from 70 bpm to 120  
267 bpm. Moreover, PA banding was applied to avoid an excessive increase in  
268 pulmonary pressure.

269 Analysis in *bPVRtc-switch* was repeated with the pulsatile MCS device  
270 operation introduced in *bPVRtc-Pswitch*. To observe the effect of pulsatility on the  
271 aortic flow and pressure, rotational speed of the device was modulated sinusoidally  
272 ( $\pm 400$  rpm) during the course of operation.

273 All these cases are summarized in Table 2.

274

275

276

277

278

279

280

281

282

283

284 **Table 2.** Clinically significant cases analyzed in this study using LPM and in vitro  
 285 mock-up flow loop

|                       |               |                                                                                                                                                                                                                                                                         |
|-----------------------|---------------|-------------------------------------------------------------------------------------------------------------------------------------------------------------------------------------------------------------------------------------------------------------------------|
| <b>Fontan</b>         |               | Ideal (optimally functioning) Fontan circulation. Corresponds to a time-point long after the 3 <sup>rd</sup> stage surgery. i.e. immediate effects of establishing full single-ventricle (SV) circulation after surgery is recovered (eg. low post-op. cardiac output). |
| <b>VD</b>             | <b>VD-Ac</b>  | <i>Fontan Failure Mode 1:</i> SV systemic dysfunction associated failure of the Fontan circulation. Acute state is simulated, suddenly after the initiation of failure.                                                                                                 |
|                       | <b>VD-Cr</b>  | <i>Fontan Failure Mode 1:</i> SV systemic dysfunction associated failure of Fontan circulation. Chronic state is simulated, long-term after the failure.                                                                                                                |
| <b>PVR</b>            | <b>PVR-Ac</b> | <i>Fontan Failure Mode 2:</i> High PVR associated failure of Fontan circulation. Acute state is simulated, suddenly after the initiation of failure.                                                                                                                    |
|                       | <b>PVR-Cr</b> | <i>Fontan Failure Mode 2:</i> High PVR associated failure of Fontan circulation. Chronic state is simulated, long-term after the failure.                                                                                                                               |
| <b>VD-cmcs</b>        |               | Conventional systemic support strategy for Fontan Failure Mode 1 ( <i>VD-Cr</i> ). Includes a clinical ventricle assist device (VAD) supporting systemic circulation.                                                                                                   |
| <b>PVR-cmcs</b>       |               | Conventional TCPC support strategy for Fontan Failure Mode 2 ( <i>PVR-Cr</i> ). Includes a Fontan assist device (FVAD) at the right-side, replacing TCPC conduit.                                                                                                       |
| <b>VD-switch</b>      |               | Proposed Fontan support strategy employing the native SV for Fontan Failure Mode 1 ( <i>VD-Cr</i> ). Hemodynamic performance is compared with Case <i>VD-cmcs</i> .                                                                                                     |
| <b>PVR-switch</b>     |               | Proposed Fontan support strategy employing the native SV for Fontan Failure Mode 2 ( <i>PVR-Cr</i> ). Hemodynamic performance is compared with Case <i>PVR-cmcs</i> .                                                                                                   |
| <b>bPVRtc-switch</b>  |               | Proposed support strategy for Fontan failure in ( <i>PVR-Cr</i> ) but with PA banding and tachycardia.                                                                                                                                                                  |
| <b>bPVRtc-Pswitch</b> |               | Repetition of ( <i>bPVRtc-switch</i> ) with a pulsatile MCS device operation. Pulsatility is generated with sinusoidal rotational speed regulation.                                                                                                                     |

286



## 287 **3. Methods**

### 288 **3.1 Proposed surgical modification**

289 Through a traditional redo cardiac surgery approach, following aortic and selective bi-  
290 caval cannulation, cardiopulmonary bypass (CPB) is established. Under total CPB,  
291 the Fontan tube graft and superior cavopulmonary anastomosis are taken down from  
292 the right PA. The defects remained in the PA are patch repaired. The superior vena  
293 cava is anastomosed to the cephalic side of the Fontan tube graft. The aorta is cross  
294 clamped, and electromechanical quiescence is achieved by cardioplegia. Through  
295 right atriotomy, a patch is fashioned to fit for isolation of the pulmonary veins  
296 posterior to the left atrium. The aortic valve is closed through an aortotomy (Figure  
297 1c). The Fontan tube graft is anastomosed side-by-side to the right atrium. Following  
298 a systemic ventriculotomy performed at the base of the heart, an appropriately-sized  
299 valved-conduit is interposed between the SV and the PA bifurcation. After priming of  
300 the MCS device, the outflow graft is anastomosed to the ascending aorta, and the  
301 inflow graft anastomosis to the left atrium is completed. Following removal of the  
302 aortic cross-clamp, the CPB flow is gradually reduced while the flow of the MCS  
303 device is increased synchronously (Figure 1c). By this way, left (via MCS device) and  
304 right sides (via SV) are totally separated like a biventricular circulation, providing a  
305  $Q_p/Q_s$  ratio of 1.

306 To investigate the proposed modification in a comparative manner, the same  
307 MCS device, HeartWare HVAD (Medtronic Inc, Fridley, Minnesota), was used for all  
308 *in silico* and *in vitro* cases. Therefore, pressure and flow hemodynamics are the main  
309 metrics to evaluate the performance of the modification subject to different circulation  
310 parameters or common disease states.

### 311 **3.2 Lumped parameter Fontan circulation model**

312 An established multi-compartmental LPM developed by our group for congenital  
313 heart disease research<sup>26,27</sup> has been adopted to simulate the introduced Fontan  
314 circulation states. This model computes the pressure and flow patterns for key  
315 vascular components by representing them as compliance chambers and resistance  
316 vessels as given in Equation (1).

$$\frac{d(CP)_i}{dt} = \sum_{j=1}^N \frac{P_j - P_i}{R_{ji}} + Q_{pump,ji} \quad (1)$$

317 where  $C$  and  $P$  are the compliance and pressure of the compliant chamber  
318 represented by the index ( $i$  or  $j$ ), respectively.  $R$  is the peripheral resistance of the  
319 vessel connecting the associated chambers.  $N$  is the number of lumped elements.  
320  $Q_{pump}$  is the flow of the MCS device (Heartware HVAD) used in *in silico* and *in vitro*  
321 simulations at the time step ( $dt$ ). Pump speed was determined based on the required  
322  $Q_{pump}$ , and remained constant during the analysis. Backward Euler method was used  
323 to iteratively solve the implicit formulation of Equation (1) using the fixed time step.

324 Compliance of the chambers are set as constant values based on the baseline  
325 patient profile (Table 1 and a file attached to the Data availability section). SV model  
326 function is modeled through the time-varying elastance concept introduced by Suga  
327 et. al.<sup>28</sup> ( $E_{SV}(t)$ ) and the “double-Hill” function  $E_n(t_n)$  described by Stergiopoulos et  
328 al.<sup>29</sup> were used in Equation (2). Double-Hill function resolved ventricle characteristics  
329 reasonably well as presented in our earlier articles<sup>27,30</sup>.

$$E_{SV}(t) = (E_{max} - E_{min})E_n(t_n) + E_{min} \quad (2)$$

330 As for the patient’s anthropometric characteristics, all the simulations and  
331 measurements were based on a 15-year-old (1.44 m<sup>2</sup>) Fontan patient (Table 1), the



332 age of which was considered as an approximate age of Fontan failure<sup>20,23</sup>. Cardiac  
333 functions, SVR and PVR were tuned according to the body size of the chosen patient  
334 profile.

### 335 **3.3 In-Vitro Mock-Up Circulation**

336 The LPM simulations were validated against our pediatric pulsatile mock-up Fontan  
337 flow loop for the ideal/functional (*Fontan*), ventricular dysfunction (*VD*), conventionally  
338 assisted ventricular dysfunction (*VD-cmcs*) and the proposed modification assisted  
339 ventricular dysfunction (*VD-switch*) Fontan failure circulations. This bench-top  
340 circulation system included a compliant ventricular phantom and computer-controlled  
341 pulse-duplicator (SuperDup'r, Vivitro Systems Inc, BC, Canada), which set the  
342 pulsatile flow rate by adjusting stroke and stroke volume, as described in our  
343 previous publications<sup>20,31</sup>. As per our experimental protocol, Fontan circuits were  
344 generated in sequence using clamps and Y-branches without significantly altering the  
345 circuit parameters or stopping the piston-pump, as seen in Figure 3. Thus, all the  
346 tested cases were comparable with each other and corresponded to the early acute  
347 changes of the proposed configuration. *In vitro* compartment parameters were  
348 adjusted representing the combination of lumped chambers in Figure 2 for sake of  
349 simplicity, so that these lumped chambers are not separately represented in Figure 3.

350 Our previously used standard 13.3 mm diameter one-degree offset based on  
351 the chest MRI of a Fontan patient TCPC connection made of glass was attached to  
352 inferior/superior vena cava and right/left PA compliance chambers<sup>32</sup>. Two clamp-on  
353 ultrasonic pulsatile flow transducers, namely a 3PXL to the pump outlet and an 8PXL  
354 to the aorta were then connected to TS410 flow modules (Transonic Systems Inc.,  
355 Ithaca, New York), which were placed downstream of the SVR and MCS device  
356 outlets. Pressure measurements (Deltran 6200, Utah Medical Products Inc., Midvale,

357 Utah) were obtained from the SV, aorta, MCS device outlet, pulmonary venous  
358 chamber and systemic venous bed. CVP was obtained from the pressure sensor  
359 placed on the inferior vena cava part of the Y-branch right after SVR. Measurements  
360 were recorded using the Lab-chart data acquisition unit (AD Instruments, Colorado  
361 Springs, Colo). Distilled water was used in the *in vitro* experiments at room  
362 temperature.

363

## 364 **4. Results**

### 365 ***4.1 In vitro validation of lumped parameter circulation model***

366 Ideal and ventricular dysfunction Fontan failure models (*Fontan*, *VD*, *VD-cmcs* and  
367 *VD-switch*) were replicated exactly in an experimental mock-up circulation flow loop  
368 for numerical validation. The pressure drop based on the inertance of the tubes  
369 representing the cardiovascular elements in our *in vitro* setup was also calculated.  
370 The maximum inertance was observed at the tube representing the aorta, as  
371 expected, which has a length of 0.03 m and a radius of 0.007 m. The inertance of this  
372 section results a maximum pressure drop of only 4% of the mean aortic pressure.  
373 Likewise, the inertance based on pressure drop in the venous tubing components are  
374 observed to be  $10^{-3}$  mmHg, primarily due to the low pulsatility. According to these  
375 observations, *in silico* and *in vitro* results were compared and agreed even though  
376 neglecting the inertance effect for simplicity.

377 For all these cases, measured aortic pressure waveforms demonstrated  
378 acceptable agreement with *in silico* LPMs computations, as shown in Figure 4. There  
379 is a small phase difference observed between the waveforms, which is based on the  
380 HR difference of 4% between *in silico* and *in vitro* simulations.

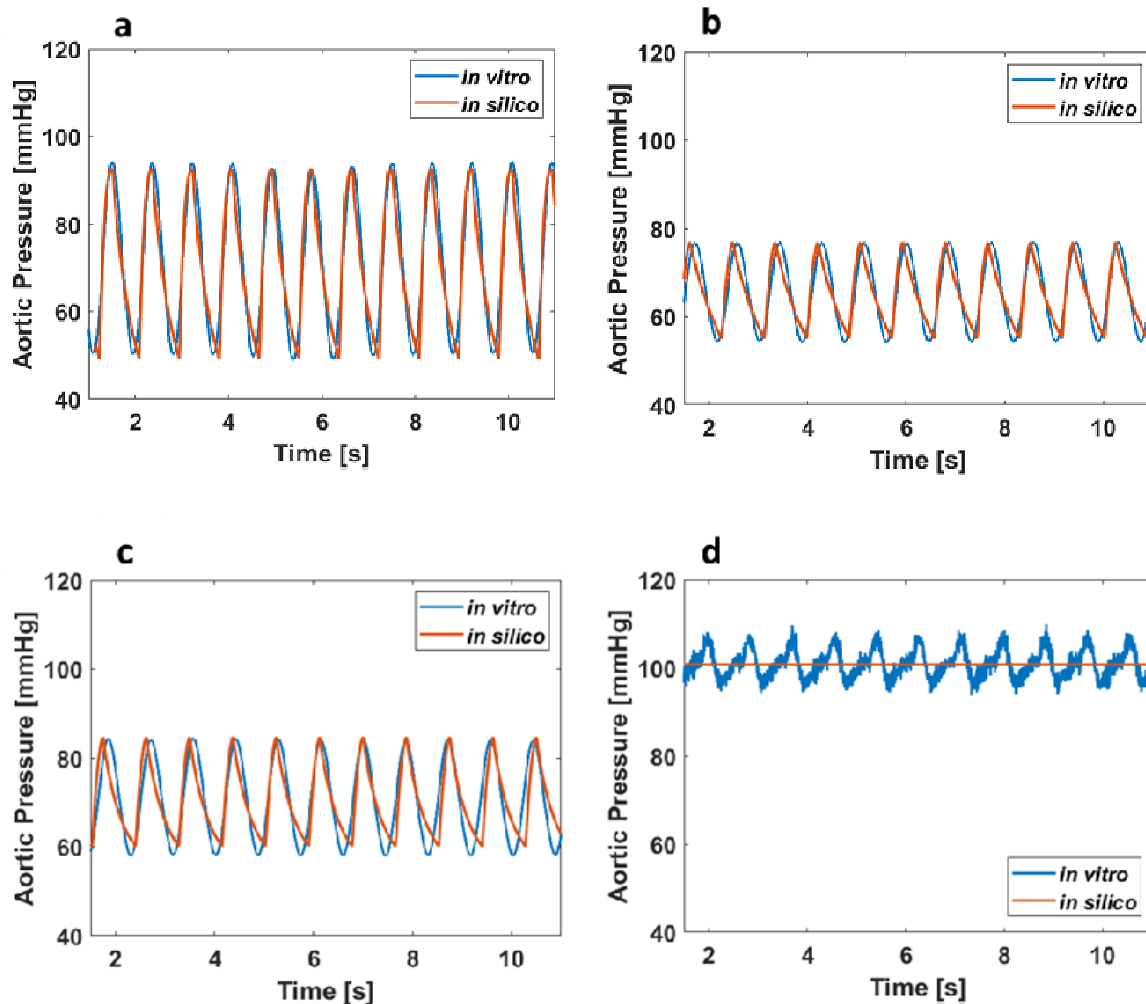

381

382 **Figure 4.** Representative hemodynamic waveforms for experimental validation. Aortic  
383 pressure waveforms obtained *in vitro* (mock-up flow loop measurements) and *in silico*  
384 LPM model are plotted for the circulation cases of (a) the healthy *baseline* (for  
385 ventricular dysfunction cases); *Fontan*, (b) ventricular dysfunction; *VD*, (c)  
386 conventional mechanical circulatory support of *VD*; *VD-cmcs* and (d) when the right-  
387 ventricle is used a right-heart in *VD* as proposed in this manuscript; *VD-switch*. All  
388 waveforms presented are recorded after the mock-up flow loop is stabilized and  
389 operating at the steady pulsatile hemodynamics.

390

391 Likewise, simulated hemodynamics were also validated through pulsatile *in*  
392 *vitro* measurements. For the SV pressure, simulated and measured values in *Fontan*  
393 and *VD-switch* matched almost exactly. On the other hand, almost 6% difference  
394 between *in silico* and *in vitro* measurements is achieved both in *VD* and *VD-cmcs*. In  
395 terms of CVP, *in silico* results agreed well with *in vitro* measurements for *VD* and *VD-*  
396 *switch*. However, CVP revealed a difference of 11% and 17% between the *in silico*  
397 and *in vitro* for *Fontan* and *VD-cmcs*, respectively. In *VD-switch*, MCS device  
398 pressure was recorded to be 101 mmHg in both *in silico* and *in vitro* analyses, yet it  
399 revealed a difference of 3% in CI values. In *VD-cmcs*, the CI of 3.43 l/min/m<sup>2</sup> was  
400 observed in both *in silico* and *in vitro* simulations. This discrepancy (max. 6.5%  
401 observed between *in silico* and *in vitro*) is due to the MCS device pressure adjusted  
402 to provide the same CI. There was no significant difference (<1 mmHg) in pulmonary  
403 venous pressures between the *in vitro* and *in silico* models in all cases.

404 In all cases, a continuous flow MCS device, Heartware HVAD (Medtronic) was  
405 used. However, a pulsatile aortic pressure waveform was observed through *in vitro*  
406 analysis in *VD-switch*, as seen in Figure 4d. In this case, the pressure sensor placed  
407 at MCS device output in *in vitro* experiments was affected by the pulsating piston  
408 ventricle of the mock-up loop (Figure 3c), which is the reason of such pulsatile aortic  
409 waveform. Therefore, even though the same mean aortic pressure was achieved,  
410 different waveforms was observed in *in silico* and *in vitro* results.

#### 411 **4.2 Fontan Failure-1, Ventricular Dysfunction Model**

412 Results associated with ventricular dysfunction models (*VD*, *VD-cmcs* and *VD-*  
413 *switch*) are shown in Table 3.

414 **Table 3.** Simulated hemodynamic parameters of the ventricular dysfunction Fontan failure state.

|                                          | <i>(VD-Cr)</i><br>Ventricular Dysfunction<br>Fontan Failure<br>(Chronic) | <i>(VD-cmcs)</i><br>Conventional Systemic MCS,<br>Ventricular Dysfunction Fontan<br>Failure | <i>(VD-switch)</i><br>Proposed Modification,<br>Ventricular Dysfunction Fontan<br>Failure |
|------------------------------------------|--------------------------------------------------------------------------|---------------------------------------------------------------------------------------------|-------------------------------------------------------------------------------------------|
| HR [bpm]                                 | 66                                                                       | 66                                                                                          | 66                                                                                        |
| EF [%]                                   | 26                                                                       | 26                                                                                          | 26                                                                                        |
| Stroke volume index [ml/m <sup>2</sup> ] | 26                                                                       | 22                                                                                          | 43                                                                                        |
| CO [l/min]                               | 2.47                                                                     | 4.93*                                                                                       | 4.95                                                                                      |
| CI [l/min/m <sup>2</sup> ]               | 1.72                                                                     | 3.42                                                                                        | 3.44                                                                                      |
| MCS device output [l/min]                | n/a                                                                      | 2.82                                                                                        | 4.95                                                                                      |
| SBP [mmHg]                               | 77                                                                       | 85                                                                                          | 101                                                                                       |
| DBP [mmHg]                               | 55                                                                       | 60                                                                                          | 101                                                                                       |
| MBP [mmHg]                               | 65.5                                                                     | 71                                                                                          | 101                                                                                       |
| CVP [mmHg]                               | 10.8                                                                     | 11.35                                                                                       | 12                                                                                        |
| PAP [mmHg]                               | 9                                                                        | 7.85                                                                                        | 17.5                                                                                      |

415 Abbreviations: CI: cardiac index, CMRI: cardiac magnetic resonance imaging, CO: cardiac output, CVP: central venous pressure, DBP: diastolic blood  
 416 pressure, EF: ejection fraction, HR: heart rate, PAP: pulmonary artery pressure, SBP: systolic blood pressure, MBP: mean blood pressure, MCS: mechanical  
 417 circulatory support. Note that the ideal Fontan circulation hemodynamic parameters to impose ventricular dysfunction are nearly 10% higher than the used  
 418 one for increased PVR model. Thus, this condition is not additionally given in this table. Figure 4a represents the waveform obtained for this *baseline*  
 419 condition. \*CO represents the total blood flow provided by the MCS device and SV.

420 In *VD*, EF of 26% led to a decrease in CI and aortic pressure by 1.7 l/min/m<sup>2</sup>  
421 and 5 mmHg, respectively. Since pumping energy (stroke volume) of the SV was  
422 reduced to decrease EF, CVP also decreased by 4 mmHg. Correspondingly, PA  
423 pressure decreased slightly from 11 mmHg to 9 mmHg.

424 In *VD-cmcs*, CI was increased by 1.7 l/min/m<sup>2</sup> with the conventional systemic  
425 support of MCS device. It augmented both the aortic and ventricular pressures by 5  
426 mmHg and 4 mmHg, respectively. CVP pressure was barely increased due to the  
427 implantation configuration of MCS device in this case (Figure 3b), unlike the  
428 conventional cavopulmonary support.

429 In *VD-switch*, MCS device directly reflects the pulmonary flow to systemic  
430 circulation. In pulmonary side, although the stroke volume of SV was nearly doubled,  
431 EF of it remained constant. Mean SV pressure was simulated as 18.5 mmHg.  
432 Additionally, PA pressure increased from 10.7 mmHg to 17.5 mmHg (39%). CVP was  
433 decreased by 2 mmHg (13%). *In silico* waveforms simulated for the ventricular  
434 dysfunction model are shown in Figure 5. As expected, suction effect of MCS device  
435 caused a decrease in pulmonary venous pressure to -1.2 mmHg, almost collapsing  
436 the *in-vitro* compliance chamber as seen in Figure 5a. Nevertheless, CI and aortic  
437 pressure increased by 1.7 l/min/m<sup>2</sup> (doubled) and 25 mmHg (38%), respectively, to  
438 compensate for the low EF.

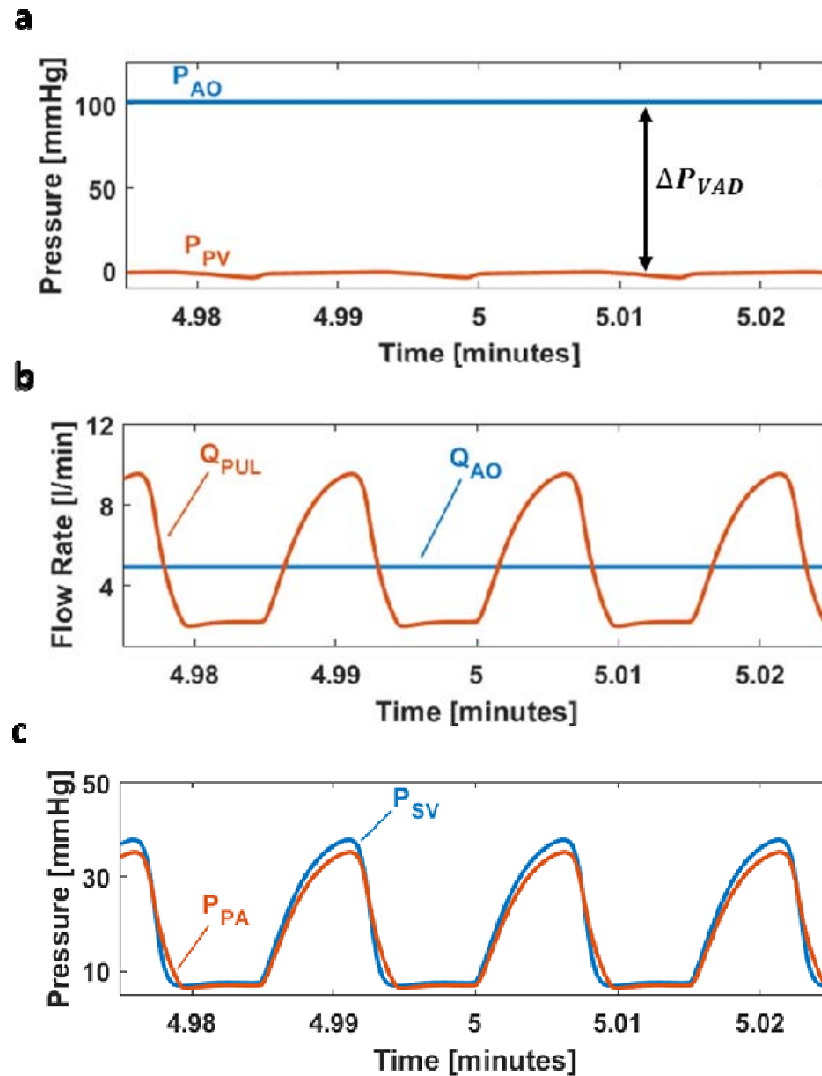

439

440 **Figure 5.** Hemodynamic waveforms computed when the single-ventricle (SV) is  
441 spared as a right-heart during the MCS of ventricular dysfunction Fontan failure mode  
442 (Failure Mode 1). **(a)** Aortic ( $P_{AO}$ ) and pulmonary venous ( $P_{PV}$ ) chamber pressures,  
443 **(b)** Aortic ( $Q_{AO}$ ) and pulmonary ( $Q_{PUL}$ ) flow waveforms with the MCS **(c)** Single  
444 ventricular ( $P_{SV}$ ) and pulmonary artery ( $P_{PA}$ ) pressure waveforms. All waveforms  
445 presented are recorded after the mock-up flow loop is stabilized and operating at the  
446 steady pulsatile hemodynamics.

447

448

449

450

### 451 **4.3 Fontan Failure-2, Increased Pulmonary Vascular Resistance Model**

452 Hemodynamics associated with the high PVR index Fontan failure cases (*PVR-*  
453 *Ac/Cr*, *PVR-cmcs*, *PVR-switch*, *bPVRtc-switch* and *bPVRtc-Pswitch*) are presented in  
454 Table 4.

455 In *PVR-Ac*, a decrease in CI by 0.35 l/min/m<sup>2</sup> and mean aortic pressure by 7  
456 mmHg was observed. CVP increased from 14 mmHg to 16.25 mmHg at this acute  
457 stage of failure. Elevated CVP also increased the PA pressure by 3 mmHg. In *PVR-*  
458 *Cr* representing the chronic condition, hemodynamic mechanisms tended to pull the  
459 systemic parameters to the ideal Fontan circulation by increasing the SVR index.  
460 Thus, CVP elevated from 14 mmHg to 18 mmHg, which led to the serious failure of  
461 Fontan circulation in time.

462 In *PVR-cmcs*, CVP decreased by 3 mmHg (16.7%) with the cavopulmonary  
463 conventional MCS. Therefore, CI increased by 0.35 l/min/m<sup>2</sup> (12.5%) and the mean  
464 aortic pressure increased by 6 mmHg (7.3%). Using the MCS device as a right  
465 ventricle in this case also increased the PA pressure from 13.5 mmHg to 15 mmHg  
466 (11.1%).

467 In *PVR-switch*, the mean aortic pressure was observed as 78 mmHg with the  
468 CI of 3.0 l/min/m<sup>2</sup>. The EF of the SV, which governs the pulmonary circulation  
469 remained as 43% while the MCSD propelled 4.32 l/min of blood to the systemic  
470 circulation. As a result, the desired systemic hemodynamic measurements as per  
471 aortic pressure and CI were obtained, which led to a decrease in CVP to 8.7 mmHg  
472 (38%). However, the PA pressure was excessively elevated to 42 mmHg as  
473 expected.



474 **Table 4.** Simulated hemodynamic parameters of the increased PVR Fontan failure state.

|                                                | <i>(Fontan)</i><br>Ideal Fontan<br>Circulation | <i>(Fontan)</i><br>Ideal Fontan<br>Circulation<br>(Egbe et al.[20]) | <i>(PVR-Ac)</i><br>Increased<br>PVR Fontan<br>Failure<br>(Acute) | <i>(PVR-Cr)</i><br>Increased<br>PVR Fontan<br>Failure<br>(Chronic) | <i>(PVR-cmcs)</i><br>Conventional<br>MCS,<br>Increased<br>PVR Fontan<br>Failure | <i>(PVR-switch)</i><br>Proposed<br>Modification,<br>Increased PVR<br>Fontan Failure | <i>(bPVRtc-switch)</i><br>Proposed<br>Modification<br>(Tachycardia and<br>pulmonary banding) | <i>(bPVRtc-Pswitch)</i><br>Proposed<br>Modification<br>(Pulsatile operation,<br>tachycardia and<br>pulmonary banding) |
|------------------------------------------------|------------------------------------------------|---------------------------------------------------------------------|------------------------------------------------------------------|--------------------------------------------------------------------|---------------------------------------------------------------------------------|-------------------------------------------------------------------------------------|----------------------------------------------------------------------------------------------|-----------------------------------------------------------------------------------------------------------------------|
| HR [bpm]                                       | 70                                             | 69 ± 7                                                              | 70                                                               | 70                                                                 | 70                                                                              | 70                                                                                  | 120                                                                                          | 120                                                                                                                   |
| EF [%]                                         | 44                                             | Echo - 43 ± 4<br>CMRI - 47 ± 6                                      | 42                                                               | 42                                                                 | 42                                                                              | 43                                                                                  | 27                                                                                           | 27                                                                                                                    |
| Stroke<br>volume index<br>[ml/m <sup>2</sup> ] | 43                                             | Echo - 46 ± 6<br>CMRI - 45 ± 6                                      | 37                                                               | 40                                                                 | 45                                                                              | 43                                                                                  | 25                                                                                           | 27                                                                                                                    |
| CO [l/min]                                     | 4.32                                           | 5.76 (4.15 - 7)                                                     | 3.69                                                             | 4.05                                                               | 4.55                                                                            | 4.32                                                                                | 4.32                                                                                         | 4.36                                                                                                                  |
| CI [l/min/m <sup>2</sup> ]                     | 3                                              | 3.2 (2.3 - 3.9)                                                     | 2.56                                                             | 2.81                                                               | 3.16                                                                            | 3                                                                                   | 3                                                                                            | 3.02                                                                                                                  |
| MCS device<br>output [l/min]                   | n/a                                            | -                                                                   | n/a                                                              | n/a                                                                | 3                                                                               | 4.32                                                                                | 4.32                                                                                         | 4.36                                                                                                                  |
| SBP [mmHg]                                     | 100                                            | -                                                                   | 90                                                               | 100                                                                | 107                                                                             | -                                                                                   | -                                                                                            | 81                                                                                                                    |
| DBP [mmHg]                                     | 67                                             | n/a                                                                 | 62                                                               | 65                                                                 | 69                                                                              | -                                                                                   | -                                                                                            | 77                                                                                                                    |
| MBP [mmHg]                                     | 82                                             | 81 ± 5                                                              | 75                                                               | 82                                                                 | 88                                                                              | 78                                                                                  | 78                                                                                           | 79                                                                                                                    |
| CVP [mmHg]                                     | 14                                             | 15 ± 4                                                              | 16.25                                                            | 18                                                                 | 15                                                                              | 8.7                                                                                 | 9.1                                                                                          | 9.25                                                                                                                  |
| PAP [mmHg]                                     | 10                                             | 10 ± 2                                                              | 12.15                                                            | 13.5                                                               | 15                                                                              | 42                                                                                  | 37                                                                                           | 35                                                                                                                    |

475 Abbreviations: CI: cardiac index, CMRI: cardiac magnetic resonance imaging, CO: cardiac output, CVP: central venous pressure, DBP: diastolic blood  
 476 pressure, EF: ejection fraction, HR: heart rate, PAP: pulmonary artery pressure, SBP: systolic blood pressure, MBP: mean blood pressure, MCS: mechanical  
 477 circulatory support.

478 In *bPVRtc-switch*, such pulmonary hypertension was aimed to ease through  
479 tachycardia and PA banding, which led to a decrease in EF from 43% to 27%.  
480 Correspondingly, the PA pressure decreased to 37 mmHg from 42 mmHg, while the  
481 aortic pressure and CI remained nearly constant as in *PVR-switch*. Additionally, the  
482 CVP slightly increased to 9.1 mmHg.

483 In *bPVRtc-Pswitch*, an approximately  $\pm 3$  mmHg of pulsatility was generated in  
484 the pulmonary flow through replacement of the continuous flow MCS device with a  
485 pulsatile one. Since the stiffness of the aortic compliance chamber is less than the  
486 PA chamber in the current LPM, only  $\pm 2$  mmHg of aortic pressure pulsatility was  
487 observed. The pulsatility in pulmonary flow was observed as  $\pm 1.15$  l/min. Although  
488 the application of a pulsatile MCS device did not significantly affect the mean aortic  
489 and PA pressures, it just provided a more physiological systemic flow waveform.  
490 Figure 6 shows the effect of pulsatile MCS device on the hemodynamic waveforms in  
491 *bPVRtc-Pswitch*. Figure 6a represents the aortic and pulmonary venous pressure  
492 waveforms under the pulsatile pump effect. Assisted aortic and pulmonary flow  
493 waveforms are shown in Figure 6b. Figure 6c demonstrated that the pulsatility  
494 generated by MCS device varied the blood flow rather than the compliance chamber  
495 pressure. Pulsatility of the PA pressure was approximately  $\pm 9$  mmHg. However,  
496 tachycardia and PA banding nearly eliminated the reverberation of it as seen in  
497 Figure 6d.

498

499

500

501

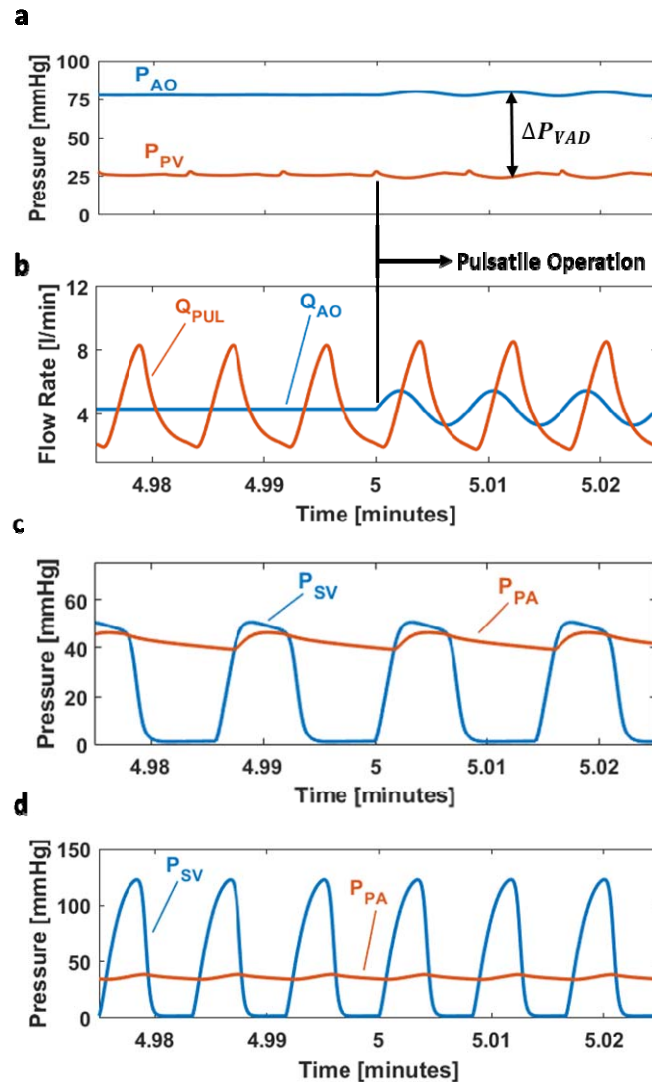

502

503 **Figure 6.** Hemodynamic waveforms computed when the single-ventricle (SV) is  
504 spared as proposed during the MCS of high PVR associated failure of Fontan  
505 circulation (Failure Mode 2). **(a)** Aortic ( $P_{AO}$ ) and pulmonary venous ( $P_{PV}$ ) chamber  
506 pressures, **(b)** Aortic ( $Q_{AO}$ ) and pulmonary ( $Q_{PUL}$ ) flow waveforms with the pulsatile  
507 MCS device operation, banding and tachycardia (Case *bPVRtc-Pswitch*), **(c)** Single  
508 ventricular ( $P_{SV}$ ) and pulmonary artery ( $P_{PA}$ ) pressure waveforms without banding  
509 and tachycardia (Case *PVR-switch*), **(d)** Single ventricle ( $P_{SV}$ ) and pulmonary artery  
510 ( $P_{PA}$ ) pressure waveforms with banding and tachycardia (Case *bPVRtc-switch*).  
511 Rotational speed modulation ( $\pm 400$  rpm) to produce pulsatility starts at time= 5  
512 minutes. All waveforms presented are recorded after the mock-up flow loop is  
513 stabilized and operating at the steady pulsatile hemodynamics.

## 514 **5. Discussion**

515 The literature includes a variety of MCS device implantation concepts for failing  
516 Fontan circulation<sup>15–19,33,34</sup>. The micro-axial and vicious impeller flow devices provide  
517 mechanical augmentation of the TCPC<sup>17–19</sup> with low blood damage. Although these  
518 systems are effective in reducing CVP<sup>17</sup>, if they fail or shut down they obstruct  
519 venous flow<sup>18</sup>. Most importantly, the chronic long-standing privation of the pulsatile  
520 pulmonary blood flow in Fontan circulation is considered the main reason of the  
521 Fontan failure through altered endothelial-dependent vasorelaxation response and  
522 depressed expression of endothelial nitric oxide synthase<sup>18,24</sup>. Use of a right-sided  
523 continuous flow MCS device continues this vicious cycle albeit at reduced venous  
524 pressure levels. The proposed concept has potential to provide a pulmonary  
525 antegrad flow reaching physiological pulsatility levels, which would also decrease  
526 pulmonary capillary recruitment and pulmonary vascular impedance<sup>35</sup>, eliminating the  
527 detrimental effects of non-pulsatile pulmonary flow. This would presumably improve  
528 the condition of the patient during bridge-to-heart transplantation.

529 Figure 5b and 5c show that the proposed modification for the ventricular  
530 dysfunction Fontan failure (*VD-switch*) provided a mean PA pressure and pulmonary  
531 waveform very similar to the native pulmonary pressure and flow, respectively.  
532 Additionally, simulated mean pressure levels of the SV used at the pulmonary side  
533 was observed to be very similar to the native right ventricle. Therefore, the proposed  
534 modification might be a potential solution providing a more physiological pulmonary  
535 flow than the conventional Fontan failure MCS. Moreover, subject to the significantly  
536 lower afterloads of the right-side, the failing SV at the pulmonary position functions at  
537 a more desirable operating point, even though it is insufficient to address the higher  
538 systemic circulation loading. During a mild lower body exercise, as simulated by our

539 LPM model, Case *VD-switch* provided the required increase in CO and PA pressure  
540 by 28% and 35%, respectively. MCS device output and aortic pressure barely  
541 increased (maximum ~5%). Therefore, it was observed that the HR increased during  
542 metabolic activity affects the PA pressure more than the aortic pressure. This is  
543 expected since SV governs the pulmonary circulation while LVAD characteristics  
544 governs the systemic circulation more than the SV function.

545 *PVR-Cr* represents a chronic increased PVR Fontan failure state, in which the  
546 CVP is maintained at 18 mmHg, which is far over the optimal limit (14 mmHg) for an  
547 ideal Fontan patient<sup>36</sup>. Based on the literature, even a 2 to 6 mmHg of support is  
548 effective in assisting cavopulmonary circulation and reducing CVP that will delay  
549 Fontan failure<sup>18,19</sup>. Correspondingly, a 3 mmHg drop in CVP achieved through  
550 conventional cavopulmonary support simulations (*PVR-cmcs*) agrees with the  
551 literature. Furthermore, the proposed modification cases with increased PVR Fontan  
552 failure (*PVR-switch* and *bPVRtc-Pswitch*) provided further decrease in the CVP (by  
553 9.3 mmHg and 8.75 mmHg, respectively), which indicates the effectiveness of this  
554 concept.

555 In the modified biventricular assistance of Nathan et al.<sup>33</sup>, both the superior  
556 and inferior cavopulmonary anastomoses are disconnected from the PA, and a new  
557 right-sided venous reservoir is created for the systemic venous inflow. Although  
558 device thrombosis was the main reason of their patient's death, 29% mortality rate  
559 was reported by de Rita et. al.<sup>34</sup>. Although the concept of creating a biventricular  
560 physiology by separating the systemic and pulmonary venous return resembles our  
561 proposed modification, the major difference of our concept is that a biventricular  
562 support is reconstructed by using one left-sided MCS device. By this way, the

563 complexity pertaining to the use of two separate devices is avoided, which, in our  
564 opinion, is another advantage of the current concept.

565 Woods et al.<sup>16</sup> introduced the use of posterior pexy of the tricuspid sub-valvar  
566 apparatus to maintain an adequate inflow from the SV in right-heart morphology in  
567 addition to the ventricular cannulation for inflow<sup>14–16,33,34</sup>. Thus, the presumed  
568 advantage of the current modification is avoidance of inflow ventricular cannulation.  
569 However, the current concept comprises a ventriculotomy for ventricle-to-PA conduit  
570 interposition, which arouses concern regarding whether the ventriculotomy-applied  
571 ventricle could maintain the pulmonary circulation or not in patients, who already had  
572 mildly reduced EF and high PVR (*PVR-Ac* and *PVR-Cr*). Pertinently, it is  
573 hypothesized that this mildly-failed SV was already supporting the whole circulation  
574 before transitioning and would be adequate for the right side. This conclusion was  
575 also supported by the findings of the proposed modification for increased PVR model  
576 (*PVR-switch*). In this case, SV redundantly supported the pulmonary circulation and  
577 moreover, led to a considerable increase in PA pressure reaching to 42 mmHg since  
578 the pumping capacity of the even mildly failed SV was considerably higher than a  
579 typical right ventricle subject to the Frank-Starling mechanism. The rise in PA  
580 pressure is one of the existing clinical challenges of patients who received a left-  
581 ventricular, or bi-ventricular assist device support<sup>37</sup>. In order to overcome the  
582 excessive rise in PA pressure, *bPVRtc-switch* was created featuring a banded or an  
583 undersized RV-to-PA conduit. This increased resistance led to a one third decrease  
584 in PA pressure from 42 to 37 mmHg. On the other hand, in *VD-switch* when a  
585 severely failed SV is used in the pulmonary position, excessive pulmonary pressures  
586 was not observed due to the lower pumping capacity. This case also provided a  
587 significant pulmonary flow pulsatility compared to the increased PVR failure support

588 with the proposed modification, as summarized in Figures 5c and 6d. Therefore, a  
589 failed SV utilized in the pulmonary circulation, which is common for the target clinical  
590 problem, will yield healthy hemodynamics at the right-side compared to a mildly  
591 reduced SV function in high PVR case. Accordingly, results revealed that the  
592 hemodynamic benefit is more pronounced in patients with low EF, enabling clinicians  
593 to utilize even a severely failing ventricle in the systemic circulation on the pulmonary  
594 side.

595 The literature comprises applications in which the inflow is directly taken from  
596 the left atrium<sup>34</sup>. As a surgical strategy, in case of an inadequate inflow from the  
597 apical SV, de Rita et al.<sup>34</sup> switched the inflow cannula to the common atrium. In  
598 respect thereof, the main foreseen constraint of our modification is the capacity of the  
599 pulmonary venous chamber, which was determined to be 25 ml. Even a slight  
600 obstruction to the pulmonary venous chamber would lead to device malfunction and  
601 death. Thus, the creation of the pulmonary venous chamber was thought to be the  
602 crux of the current modification. Even so, the suctioning effect of a continuous flow  
603 MCS device would reflect to the pulmonary venous bed and inevitably lead to  
604 collapse. Thus, it can clearly be predicted that the current concept is not suitable for  
605 patients with stage III-palliated hypoplastic left heart syndrome due to their innately  
606 small left atrial chamber. Additionally, presence of a Damus-Kay-Stansel root would  
607 preclude the creation of an SV-to-PA conduit interposition.

608 The most important constraint of the current concept is fail to reach the  
609 anticipated levels of systemic circulatory support due to ineffective left atrial  
610 unloading. As a back-up plan for this malady, creating a systemic venous  
611 compartment within the Fontan tube graft through taking-down the Fontan graft-right  
612 atrial anastomosis, and switching the inflow cannula to the Fontan graft, creating a

613 pulmonary venous atrium through removing the intra-atrial patch, connecting the  
614 outflow cannula to the PA or the conduit, and re-opening the aortic valve can be  
615 applied. By this way, biventricular circulation can be maintained but with an assisted  
616 pulmonary circulation. Another foreseen concern of the current modification is the  
617 complexity of the surgical procedure with potentially long cardiopulmonary by-pass  
618 times in a patient with an already impaired ventricular function. The concept in  
619 creating a left atrial chamber is similar to the already existing Senning procedure<sup>38</sup>,  
620 which supports the clinical viability of proposed modification despite its complexity.

621         The surgical complexity necessitates another back-up plan if the proposed  
622 modification fails. In case of SV failure, rather than using another RVAD replacing the  
623 SV, which evolves the system to a BiVAD circulation, the modification will be  
624 reversed to a Fontan circulation with TCPC and an LVAD.

625         Similar to continuous flow MCS devices<sup>15</sup>, the Berlin Heart Excor can be  
626 applied to a wide range of patients from infants to adults. A pulsatile extra-corporeal  
627 MCS device seems to be more convenient for the current modification due to the  
628 effective decompression during pump diastole that is only 60% of each pump cycle<sup>15</sup>.  
629 By this way, the continuous suctioning effect of a continuous flow device could be  
630 avoided. In addition, the average 40% of blood left in the relatively small pulmonary  
631 venous chamber can further prevent its collapse.

632         The LPM and mock-up flow loop indicated that the proposed arrangement  
633 would work and satisfy the biventricular pressure and flow levels. One caution is the  
634 requirement of a relatively low venous compliance level. Otherwise, the suction  
635 generated by the MCS device would lead to collapse in pulmonary venous chamber.  
636 Therefore, a high systemic (MCS device) pressure reaching 110 mmHg to 120  
637 mmHg might be challenging to keep this chamber open in the proposed modification.



638 Although we observed the maximum pressure drop in the pulmonary venous  
639 chamber as almost -1 mmHg, the clinically-recorded limit of negative pressure in  
640 vacuum-assisted venous return is between -20 and -40 mmHg<sup>39</sup>. Therefore, it is  
641 predicted that the collapse risk is minimal during the clinical application of proposed  
642 modification.

643 However, an average systemic pressure around 90 mmHg to 95 mmHg can  
644 easily be achieved with no pulmonary venous suctioning effect.

645

## 646 **6. Conclusion**

647 Achieving an optimal management strategy for failing Fontan circulation by MCS  
648 devices is an ongoing effort. A consensus on the ideal MCS device implantation  
649 strategy has not yet defined due to the limited data and clinical experience as well as  
650 large patient-to-patient variation. Even though the detailed in vitro and in silico  
651 simulations of the proposed fictional concept with the use of an actual continuous  
652 flow device showed encouraging results, our modification is originally planned for the  
653 long-term support as a bridge to transplantation. Therefore, it is essential to test this  
654 proof-of-concept idea in an animal model. Thus, specially targeting the low resource  
655 settings with limited access to MCS devices and heart transplantation, sparing the  
656 native ventricle as a right-heart support will provide a novel perspective for MCSD  
657 device implantation in failed Fontan patients.

658

659

660

661 **Data availability**

662 There are no restrictions on the availability of materials or information. The datasets  
663 generated and/or analyzed during the current study are available via  
664 <https://doi.org/10.5281/zenodo.6300829>. For any questions, please contact  
665 corresponding authors.

666

667 **Acknowledgements**

668 We would like to express our gratitude to Medtronic for providing a loaner HeartWare  
669 MCS pump during the *in vitro* experiments and Elsevier Illustration Service for the  
670 drawing of Figure 1.

671

672 **Funding**

673 Funding was provided by research grants from the European Research Council  
674 (ERC) Proof of Concept *BloodTurbine*, TUBITAK 118M369 and TUBITAK 118S108  
675 (PI: Kerem Pekkan).

676

677 **Author contributions**

678 ES, ONT, YA, MO, KP hypothesized and introduced the proposed concept. CY, BA,  
679 KP designed and conducted computational and experimental work. All authors wrote  
680 and edited the manuscript text.

681

682

683 **Conflict of interest**

684 None declared.

## References

1. Hoffman, J. I. E. & Kaplan, S. The incidence of congenital heart disease. *Journal of the American College of Cardiology* vol. 39 Preprint at [https://doi.org/10.1016/S0735-1097\(02\)01886-7](https://doi.org/10.1016/S0735-1097(02)01886-7) (2002).
2. Reller, M. D., Strickland, M. J., Riehle-Colarusso, T., Mahle, W. T. & Correa, A. Prevalence of Congenital Heart Defects in Metropolitan Atlanta, 1998-2005. *Journal of Pediatrics* **153**, (2008).
3. Fontan, F. & Baudet, E. Surgical repair of tricuspid atresia. *Thorax* **26**, (1971).
4. Kavarana, M. N. *et al.* Seven-year clinical experience with the extracardiac pedicled pericardial fontan operation. *Annals of Thoracic Surgery* **80**, (2005).
5. Cilliers, A. & Gewillig, M. Fontan procedure for univentricular hearts: Have changes in design improved outcome? *Cardiovascular Journal of South Africa* **13**, (2002).
6. Kim, S. J., Kim, W. H., Lim, H. G., Lee, C. H. & Lee, J. Y. Improving Results of the Fontan Procedure in Patients With Heterotaxy Syndrome. *Annals of Thoracic Surgery* **82**, (2006).
7. Mair, D. D., Puga, F. J. & Danielson, G. K. The Fontan procedure for tricuspid atresia: Early and late results of a 25-year experience with 216 patients. *J Am Coll Cardiol* **37**, (2001).
8. Mitchell, M. E. *et al.* Intermediate outcomes after the Fontan procedure in the current era. *Journal of Thoracic and Cardiovascular Surgery* **131**, (2006).
9. Rehan, R., Kotchetkova, I., Cordina, R. & Celermajer, D. Adult Congenital Heart Disease Survivors at Age 50 Years: Medical and Psychosocial Status. *Heart Lung Circ* **30**, (2021).
10. Warnes, C. A. *et al.* Task force 1: the changing profile of congenital heart disease in adult life. *J Am Coll Cardiol* **37**, (2001).
11. Rychik, J. The Relentless Effects of the Fontan Paradox. *Seminars in Thoracic and Cardiovascular Surgery: Pediatric Cardiac Surgery Annual* vol. 19 Preprint at <https://doi.org/10.1053/j.pcsu.2015.11.006> (2016).
12. Jaquiss, R. D. B. & Aziz, H. Is Four Stage Management the Future of Univentricular Hearts? Destination Therapy in the Young. *Seminars in Thoracic and Cardiovascular Surgery: Pediatric Cardiac Surgery Annual* vol. 19 Preprint at <https://doi.org/10.1053/j.pcsu.2015.12.004> (2016).
13. Bernstein, D. *et al.* Outcome of listing for cardiac transplantation for failed Fontan: A multi-institutional study. *Circulation* **114**, (2006).
14. Weinstein, S. *et al.* The use of the Berlin heart EXCOR in patients with functional single ventricle. *Journal of Thoracic and Cardiovascular Surgery* **147**, (2014).
15. Horne, D., Conway, J., Rebeyka, I. M. & Buchholz, H. Mechanical Circulatory Support in Univentricular Hearts: Current Management. *Seminars in Thoracic and Cardiovascular Surgery: Pediatric Cardiac Surgery Annual* vol. 18 Preprint at <https://doi.org/10.1053/j.pcsu.2015.02.002> (2015).
16. Woods, R. K., Ghanayem, N. S., Mitchell, M. E., Kindel, S. & Niebler, R. A. Mechanical Circulatory Support of the Fontan Patient. *Seminars in Thoracic and Cardiovascular Surgery*:

- Pediatric Cardiac Surgery Annual* vol. 20 Preprint at <https://doi.org/10.1053/j.pcsu.2016.09.009> (2017).
17. Giridharan, G. A. *et al.* Performance evaluation of a pediatric viscous impeller pump for Fontan cavopulmonary assist. *Journal of Thoracic and Cardiovascular Surgery* **145**, (2013).
  18. Rodefeld, M. D. *et al.* Cavopulmonary Assist: Circulatory Support for the Univentricular Fontan Circulation. *Annals of Thoracic Surgery* **76**, (2003).
  19. Gandolfo, F. *et al.* Mechanically Assisted Total Cavopulmonary Connection With an Axial Flow Pump: Computational and In Vivo Study. *Artif Organs* **40**, (2016).
  20. Pekkan, K. *et al.* In vitro validation of a self-driving aortic-turbine venous-assist device for Fontan patients. *Journal of Thoracic and Cardiovascular Surgery* **156**, (2018).
  21. Dell'Italia, L. J. Anatomy and Physiology of the Right Ventricle. *Cardiology Clinics* vol. 30 Preprint at <https://doi.org/10.1016/j.ccl.2012.03.009> (2012).
  22. Karimov, J. H. *et al.* Limitations to Chronic Right Ventricular Assist Device Support. *Annals of Thoracic Surgery* vol. 102 Preprint at <https://doi.org/10.1016/j.athoracsur.2016.02.006> (2016).
  23. Egbe, A. C. *et al.* Hemodynamics of Fontan Failure: The Role of Pulmonary Vascular Disease. *Circ Heart Fail* **10**, (2017).
  24. Pekkan, K. *et al.* Coupling pediatric ventricle assist devices to the Fontan circulation: Simulations with a lumped-parameter model. in *ASAIO Journal* vol. 51 (2005).
  25. Kung, E. *et al.* A simulation protocol for exercise physiology in fontan patients using a closed loop lumped-Parameter Model. *J Biomech Eng* **136**, (2014).
  26. Yigit, B., Tutsak, E., Yildirim, C., Hutchon, D. & Pekkan, K. Transitional fetal hemodynamics and gas exchange in premature postpartum adaptation: immediate vs. delayed cord clamping. *Matern Health Neonatol Perinatol* **5**, (2019).
  27. Yigit, M. B., Kowalski, W. J., Hutchon, D. J. R. & Pekkan, K. Transition from fetal to neonatal circulation: Modeling the effect of umbilical cord clamping. *J Biomech* **48**, (2015).
  28. Suga, H., Sagawa, K. & Shoukas, A. A. Load independence of the instantaneous pressure-volume ratio of the canine left ventricle and effects of epinephrine and heart rate on the ratio. *Circ Res* **32**, (1973).
  29. Stergiopoulos, N., Meister, J. J. & Westerhof, N. Determinants of stroke volume and systolic and diastolic aortic pressure. *Am J Physiol Heart Circ Physiol* **270**, (1996).
  30. Peer, S. M. *et al.* Mechanical support of pulmonary blood flow as a strategy to support the Norwood circulation-lumped parameter model study. *European Journal of Cardio-Thoracic Surgery* ezac262 (2022) doi:10.1093/ejcts/ezac262.
  31. Dur, O. *et al.* Pulsatile in vitro simulation of the pediatric univentricular circulation for evaluation of cardiopulmonary assist scenarios. *Artif Organs* **33**, (2009).
  32. Pekkan, K. *et al.* Total cavopulmonary connection flow with functional left pulmonary artery stenosis: Angioplasty and fenestration in vitro. *Circulation* **112**, (2005).

33. Nathan, M. *et al.* Successful implantation of a Berlin heart biventricular assist device in a failing single ventricle. *Journal of Thoracic and Cardiovascular Surgery* **131**, (2006).
34. de Rita, F. *et al.* Mechanical cardiac support in children with congenital heart disease with intention to bridge to heart transplantation. *European Journal of Cardio-thoracic Surgery* **46**, (2014).
35. Presson, R. G., Baumgartner, W. A., Peterson, A. J., Glenny, R. W. & Wagner, W. W. Pulmonary capillaries are recruited during pulsatile flow. *J Appl Physiol* **92**, (2002).
36. Ohuchi, H. Where is the 'optimal' fontan hemodynamics? *Korean Circulation Journal* vol. 47 Preprint at <https://doi.org/10.4070/kcj.2017.0105> (2017).
37. Fukamachi, K. *et al.* Implantable continuous-flow right ventricular assist device: Lessons learned in the development of a cleveland clinic device. *Annals of Thoracic Surgery* vol. 93 Preprint at <https://doi.org/10.1016/j.athoracsur.2012.02.026> (2012).
38. Stark, J. Senning Operation. *Operative Techniques in Thoracic and Cardiovascular Surgery* **3**, (1998).
39. Gao, S. *et al.* Vacuum-assisted venous drainage in adult cardiac surgery: A propensity-matched study. *Interact Cardiovasc Thorac Surg* **30**, (2020).
